# Supplementary material for: A phase-engineered nickel sulfide and phosphide (NiS–Ni2P) heterostructure for enhanced hydrogen evolution performance supported with DFT analysis
Source: Royal Society of Chemistry journal article supplement (doi:10.1039/d3se00685a), 2023-01-01
Supplement: d3se00685a1.pdf [file d3se00685a1.pdf]

## Supplementary Information

### Phase-engineered nickel sulfide and phosphide (NiS-Ni<sub>2</sub>P) heterostructure for enhanced hydrogen evolution performance supported with DFT analysis

Jiban K. Das,<sup>a, b</sup> Nachiketa Sahu,<sup>a, b</sup> Pratap Mane,<sup>c</sup> Brahmananda Chakraborty\*,<sup>d, e</sup> and J. N. Behera\*<sup>a, b</sup>

<sup>a</sup>School of Chemical Sciences, National Institute of Science Education and Research (NISER),

An OCC of Homi Bhabha National Institute (HBNI), Khurdha, 752050, Odisha, India

<sup>b</sup>Centre for Interdisciplinary Sciences (CIS), NISER, 752050, Jatni, Odisha, India

<sup>c</sup> Seismology Division, Bhabha Atomic Research Centre, Trombay, Mumbai-400085, India

<sup>d</sup>High Pressure & Synchrotron Radiation Physics Division, Bhabha Atomic Research Centre, Trombay, Mumbai-400085, India

<sup>e</sup> Homi Bhabha National Institute, Mumbai-400094, India

E-mail: [jnbehera@niser.ac.in](mailto:jnbehera@niser.ac.in)

E-mail: [brahma@barc.gov.in](mailto:brahma@barc.gov.in)

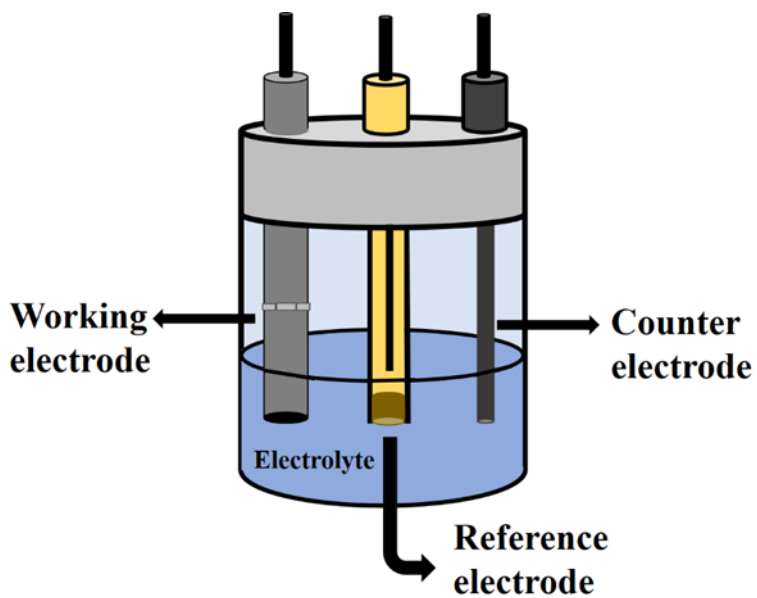

**Fig. S1** Schematic representation of electrode setup for the HER studies.

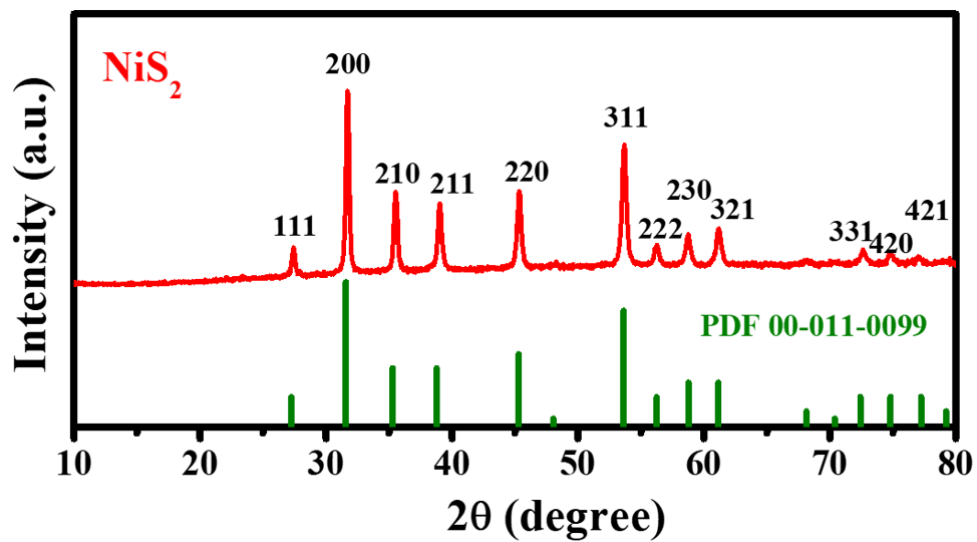

**Fig. S2** Powder diffraction pattern of single-phase  $\text{NiS}_2$ .

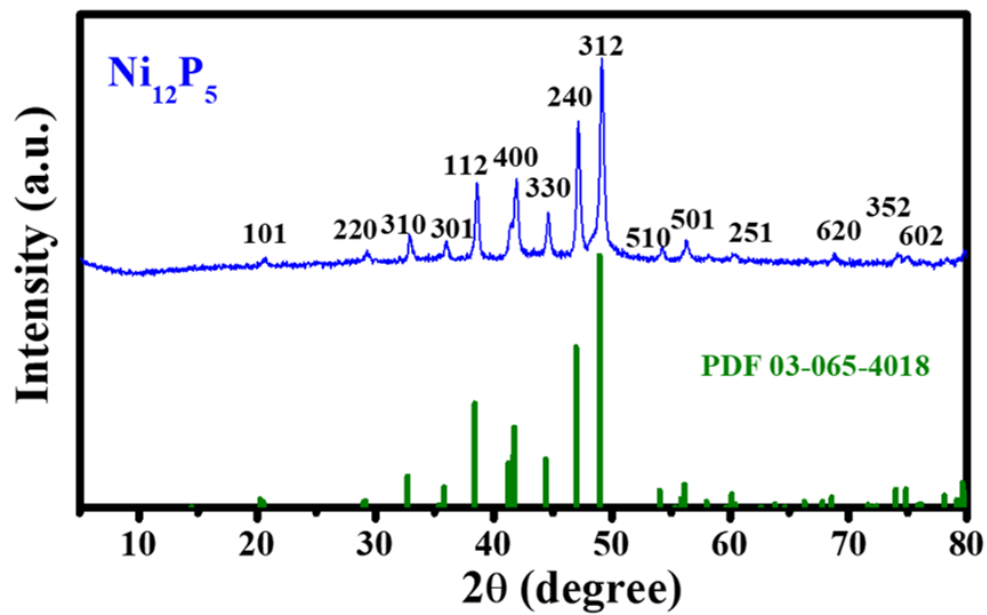

Fig. S3 PXRD pattern of  $\text{Ni}_{12}\text{P}_5$ .

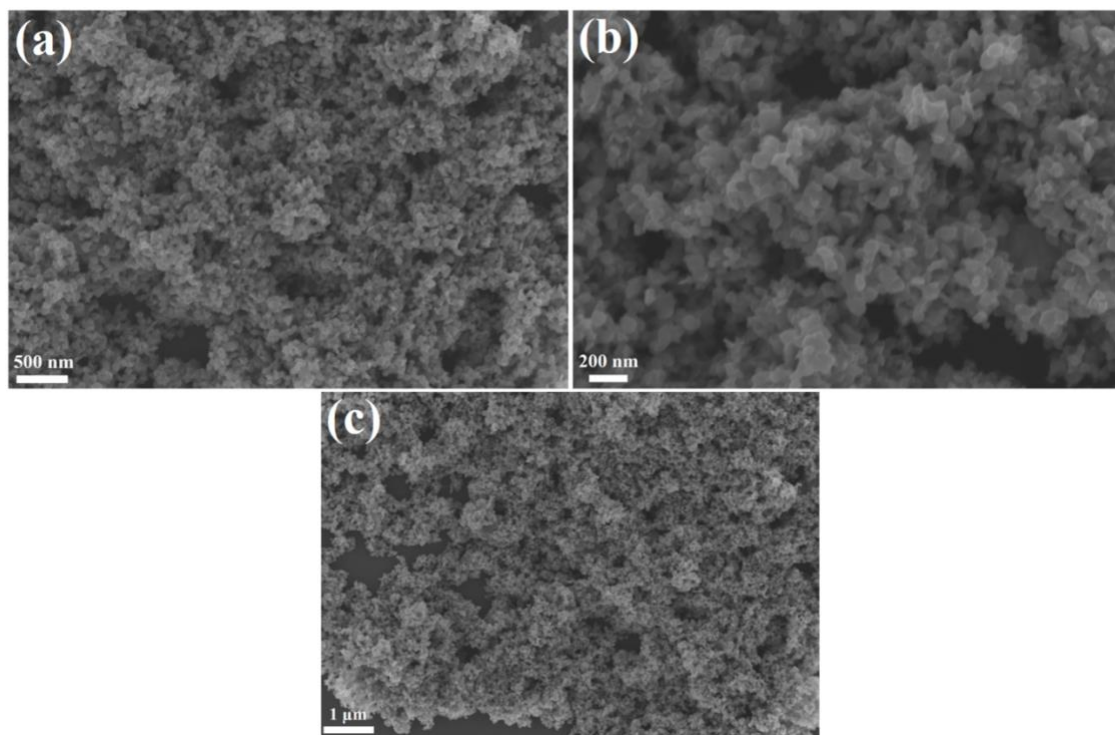

Fig. S4 FESEM pictures of  $\text{NiS}_2$ .

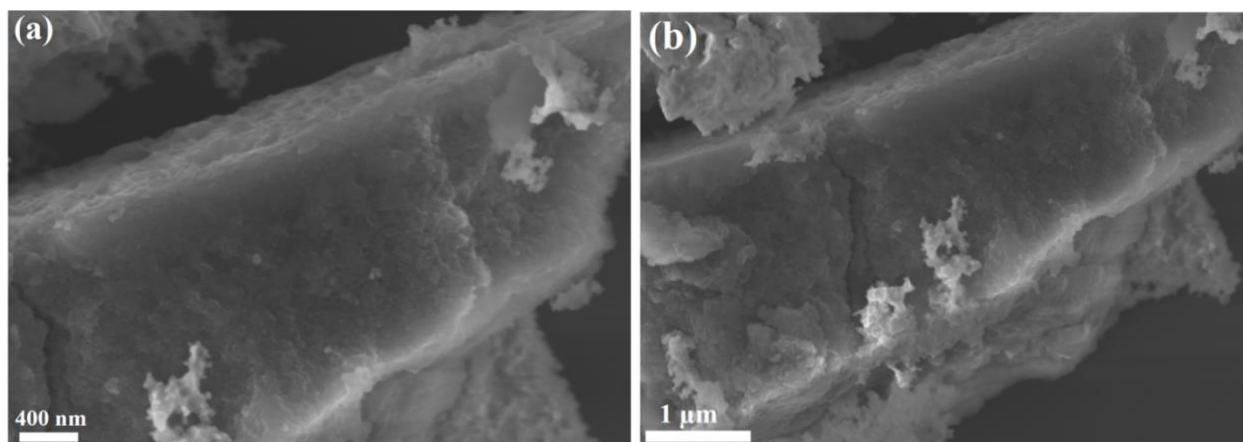

**Fig. S5** FESEM analysis of Ni<sub>12</sub>P<sub>5</sub>.

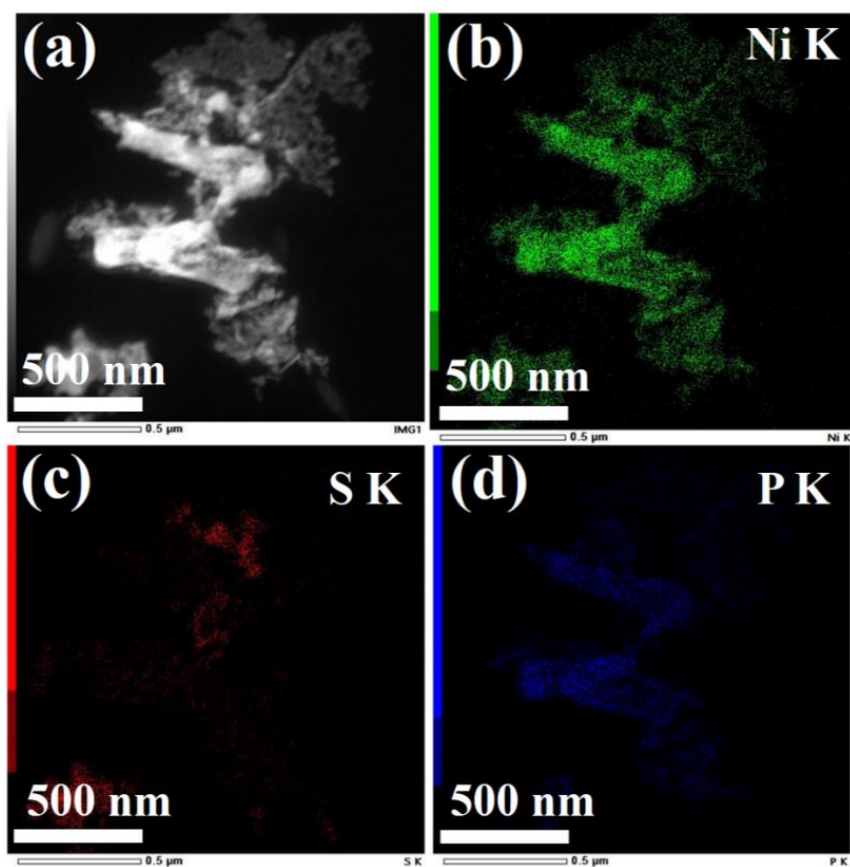

**Fig. S6** Elemental mapping images of NiS-Ni<sub>2</sub>P show the presence of Ni (K), S (K), and P (K).

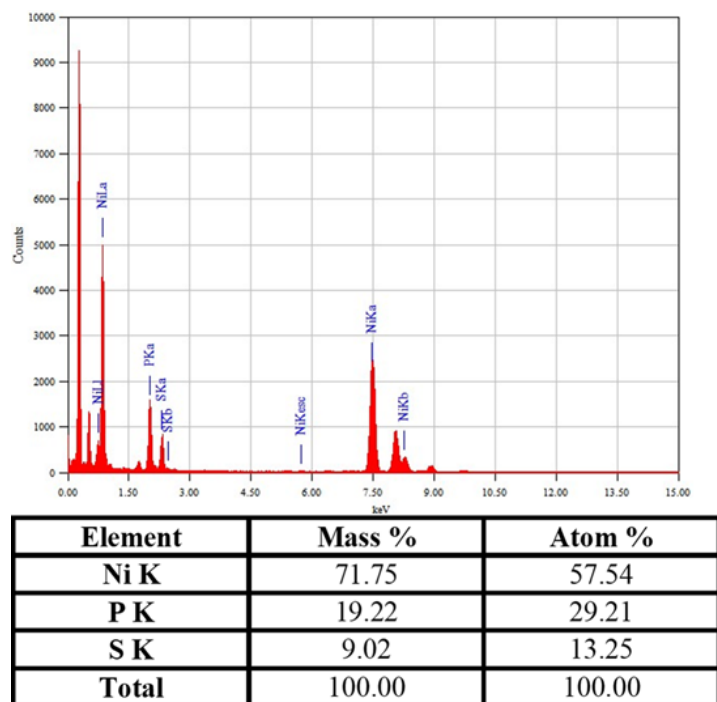

**Fig. S7** EDAX spectrum with the elemental composition of NiS-Ni<sub>2</sub>P heterostructure.

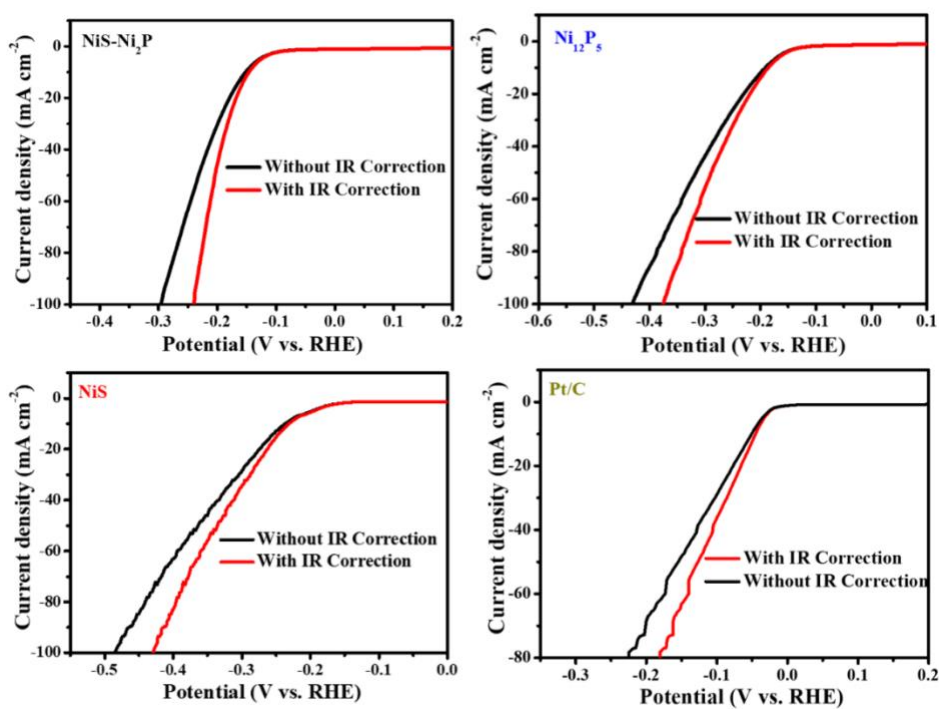

**Fig. S8** LSVs for NiS-Ni<sub>2</sub>P, NiS<sub>2</sub>, Ni<sub>12</sub>P<sub>5</sub>, and Pt/C before and after an *iR* correction in 0.5 M H<sub>2</sub>SO<sub>4</sub>.

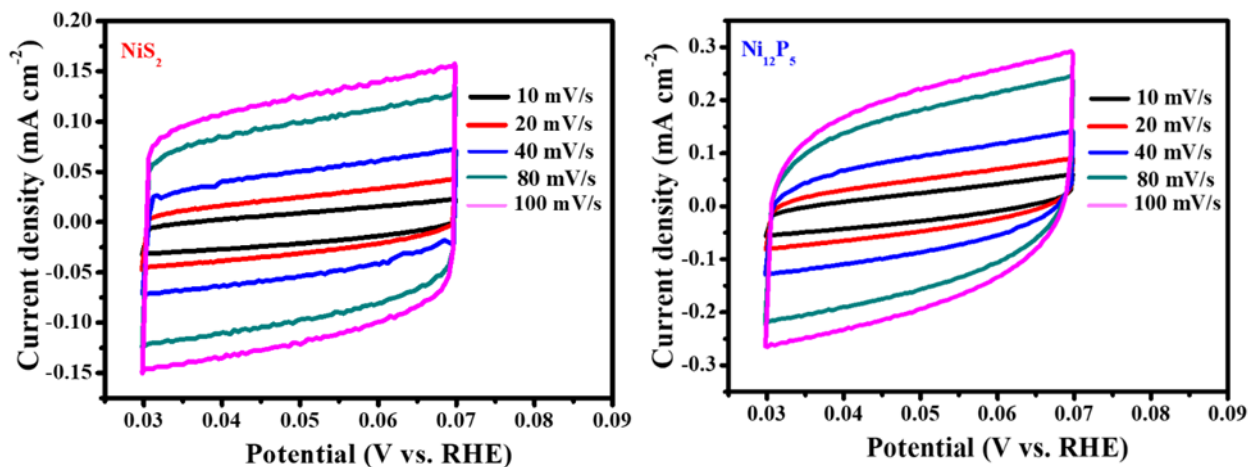

**Fig. S9** (a, b) Cyclic voltammety curve recorded in 0.5 M H<sub>2</sub>SO<sub>4</sub> at scan rates of 10-100 mV/s for NiS<sub>2</sub> and Ni<sub>12</sub>P<sub>5</sub>.

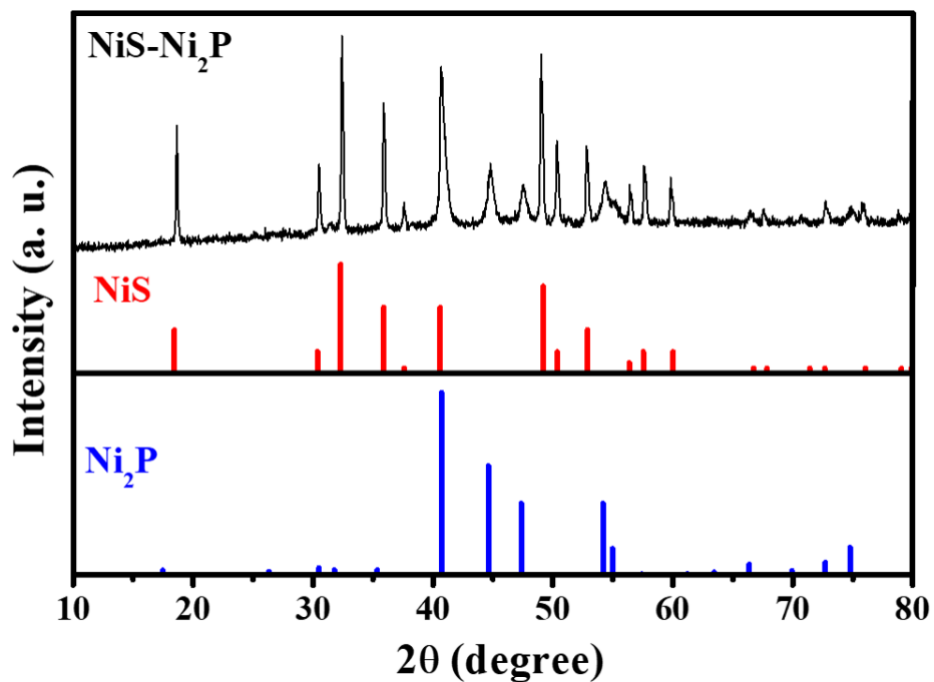

**Fig. S10** PXRD pattern for NiS-Ni<sub>2</sub>P heterostructure after the 23 h of durability test at 10 mA/cm<sup>2</sup>.

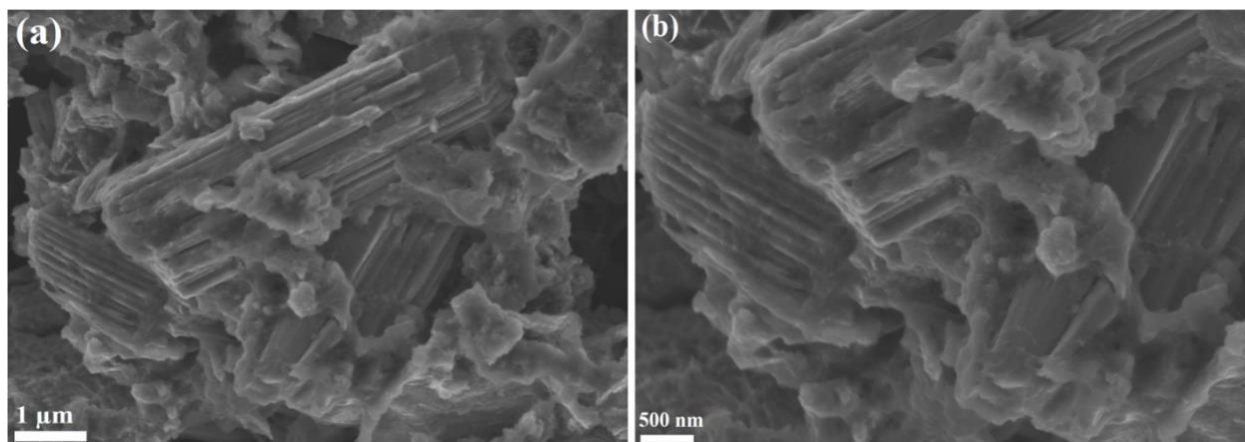

**Fig. S11** (a, b) FESEM analysis of the active material NiS-Ni<sub>2</sub>P after the chronopotentiometry test at the current density of 10 mA/cm<sup>2</sup>.

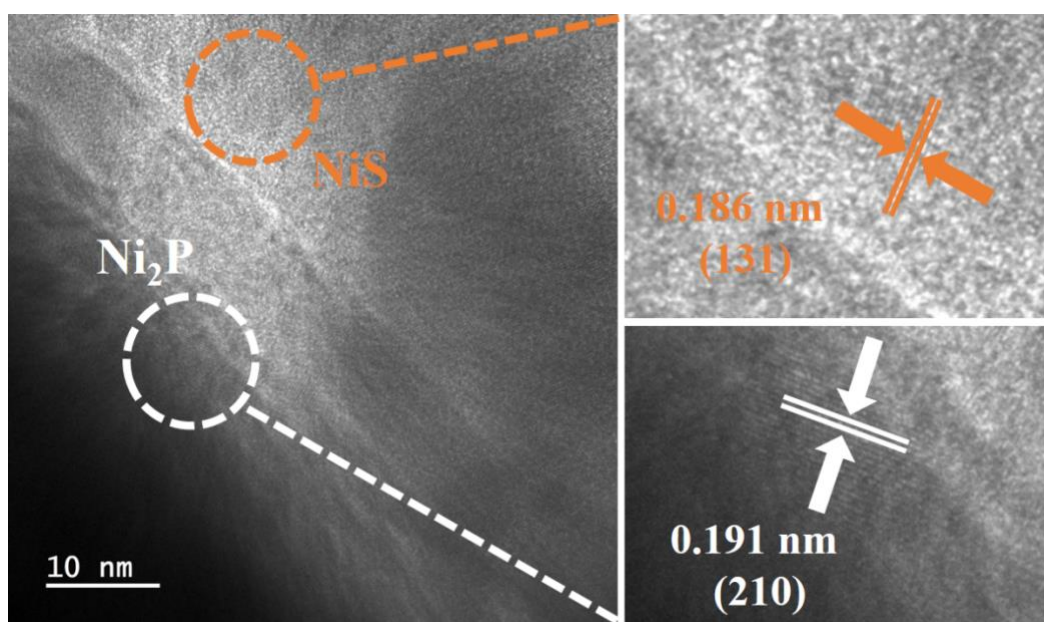

**Fig. S12** HRTEM analysis of NiS-Ni<sub>2</sub>P heterostructures after the stability test.

**Table S1.** The comparison of HER performance in 0.5 M H<sub>2</sub>SO<sub>4</sub> with reported nickel phosphides and sulfides electrode materials.

| <b>Electrocatalyst used</b>                | <b>Overpotential at 10 mA cm<sup>-2</sup> (mV)</b> | <b>Tafel slope (mV dec<sup>-1</sup>)</b> | <b>Electrolyte</b>                       | <b>References</b>                                     |
|--------------------------------------------|----------------------------------------------------|------------------------------------------|------------------------------------------|-------------------------------------------------------|
| Ni <sub>2</sub> P                          | 295                                                | 115                                      | 0.5 M H <sub>2</sub> SO <sub>4</sub>     | ChemElectroChem, 2017, 4(2), 340–344                  |
| Ni <sub>12</sub> P <sub>5</sub>            | 182                                                | 63                                       | 0.5 M H <sub>2</sub> SO <sub>4</sub>     | Chem.–Eur. J., 2018, 24(45), 11748–11754              |
| Ni <sub>8</sub> P <sub>3</sub>             | 152                                                | 86                                       | 0.5 M H <sub>2</sub> SO <sub>4</sub>     | ACS Appl. Mater. Interfaces, 2016, 8(41), 27850–27858 |
| NiS                                        | 250                                                | 51.2                                     | 0.5 M H <sub>2</sub> SO <sub>4</sub>     | RSC Adv., 2015, 5(127), 104740–104749                 |
| NiP <sub>2</sub>                           | 172                                                | 62                                       | 0.5 M H <sub>2</sub> SO <sub>4</sub>     | RSC Adv., 2015, 5(14), 10290–10295                    |
| NiS <sub>2</sub>                           | 249                                                | 55                                       | 0.5 M H <sub>2</sub> SO <sub>4</sub>     | J. Mater. Chem. A, 2017, 5, 10173–10181               |
| Fe-doped NiS <sub>2</sub>                  | 198                                                | 42                                       | 0.5 M H <sub>2</sub> SO <sub>4</sub>     | J. Mater. Chem. A, 2019, 7, 4971–4976                 |
| Ni <sub>2</sub> P                          | 224                                                | 82                                       | 0.5 M H <sub>2</sub> SO <sub>4</sub>     | ACS Appl. Energy Mater. 2020, 3, 6525–6535            |
| <b>NiS-Ni<sub>2</sub>P Heterostructure</b> | <b>147</b>                                         | <b>68</b>                                | <b>0.5 M H<sub>2</sub>SO<sub>4</sub></b> | <b>This Work</b>                                      |



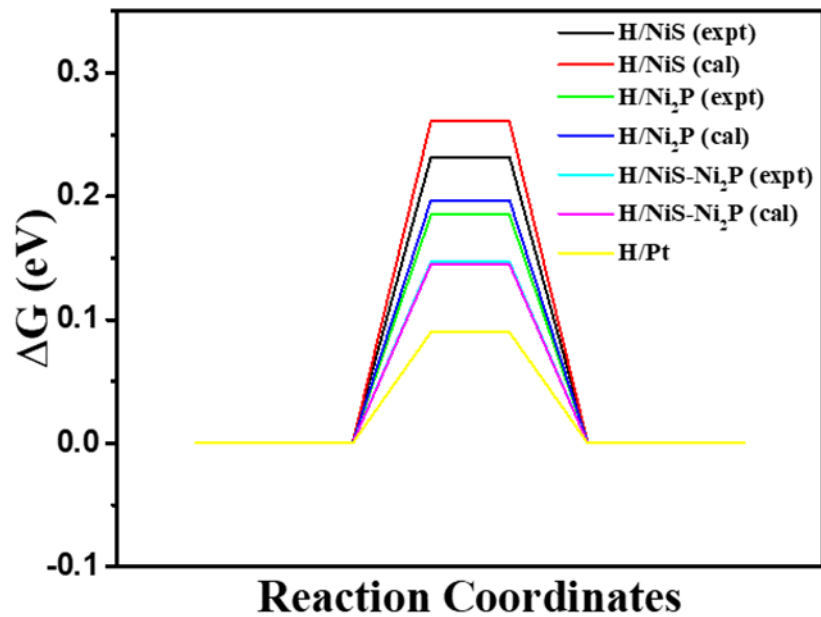

**Figure S13** Comparison of variation of change in Gibb’s free energy with the reaction coordinates for all electrode materials, along with the value for the best catalyst Pt also included.

**Table S2.** Comparison of overpotential for HER between experimental and simulations.

| System                | HER(Expt.) mV | HER(Cal.) mV |
|-----------------------|---------------|--------------|
| NiS                   | 232           | 261          |
| Ni <sub>2</sub> P     | 185           | 197          |
| NiS-Ni <sub>2</sub> P | 147           | 145          |
